# Supplementary material
Source: Research Square preprint supplement (doi:10.21203/rs.3.rs-9687640/v1)
Supplement: Supplementary file 1 [file 097da5da99b310b970c0a797.pdf]

## Extended Data Tables

**Table 1 | AlphaFold-related and non-AlphaFold publication counts by discipline and domain (2019-2025)**

| Discipline                                   | Domain                               | AF work | Non-AF work |
|----------------------------------------------|--------------------------------------|---------|-------------|
| Biochemistry, Genetics and Molecular Biology | Molecular Biology                    | 20597   | 1875678     |
| Biochemistry, Genetics and Molecular Biology | Genetics                             | 2022    | 516035      |
| Biochemistry, Genetics and Molecular Biology | Cell Biology                         | 1806    | 201648      |
| Biochemistry, Genetics and Molecular Biology | Biotechnology                        | 459     | 82641       |
| Biochemistry, Genetics and Molecular Biology | Endocrinology                        | 415     | 41620       |
| Biochemistry, Genetics and Molecular Biology | Cancer Research                      | 360     | 266849      |
| Biochemistry, Genetics and Molecular Biology | Biochemistry                         | 351     | 52485       |
| Biochemistry, Genetics and Molecular Biology | Structural Biology                   | 299     | 10188       |
| Biochemistry, Genetics and Molecular Biology | Molecular Medicine                   | 264     | 69576       |
| Biochemistry, Genetics and Molecular Biology | Biophysics                           | 261     | 135800      |
| Biochemistry, Genetics and Molecular Biology | Aging                                | 189     | 18996       |
| Biochemistry, Genetics and Molecular Biology | Physiology                           | 137     | 27523       |
| Biochemistry, Genetics and Molecular Biology | Clinical Biochemistry                | 96      | 45469       |
| Biochemistry, Genetics and Molecular Biology | Developmental Biology                | 7       | 17106       |
| Immunology and Microbiology                  | Immunology                           | 978     | 336588      |
| Immunology and Microbiology                  | Microbiology                         | 439     | 64652       |
| Immunology and Microbiology                  | Virology                             | 243     | 39203       |
| Immunology and Microbiology                  | Applied Microbiology & Biotechnology | 9       | 29649       |
| Pharmacology, Toxicology and Pharmaceutics   | Pharmacology                         | 137     | 111206      |
| Pharmacology, Toxicology and Pharmaceutics   | Toxicology                           | 28      | 24137       |
| Pharmacology, Toxicology and Pharmaceutics   | Pharmaceutical Science               | 24      | 67690       |
| Pharmacology, Toxicology and Pharmaceutics   | Drug Discovery                       | 0       | 1715        |

**Table 2 | Country rankings by pre-AlphaFold R&D strength (2015-2018 R&D expenditure and pre-AlphaFold life-science output)**

| R&D Rank | ISO Code | Country                  | R&D expenditure (% of GDP) | Pre-AF life-science output | Composite R&D-strength index | R&D-strength group |
|----------|----------|--------------------------|----------------------------|----------------------------|------------------------------|--------------------|
| 1        | IL       | Israel                   | 4.637                      | 7385.9                     | 2.386                        | High               |
| 2        | KR       | South Korea              | 3.98                       | 33968.2                    | 2.361                        | High               |
| 3        | US       | United States of America | 2.871                      | 334354.5                   | 2.259                        | High               |
| 4        | JP       | Japan                    | 3.183                      | 58992.2                    | 2.063                        | High               |
| 5        | DE       | Germany                  | 2.95                       | 62301.1                    | 1.954                        | High               |
| 6        | SE       | Sweden                   | 3.309                      | 10818.9                    | 1.779                        | High               |
| 7        | CN       | China                    | 2.064                      | 192517.0                   | 1.728                        | High               |
| 8        | CH       | Switzerland              | 3.046                      | 13828.1                    | 1.693                        | High               |
| 9        | GB       | United Kingdom           | 2.408                      | 59334.9                    | 1.663                        | High               |
| 10       | DK       | Denmark                  | 3.02                       | 9305.5                     | 1.598                        | High               |
| 11       | AT       | Austria                  | 3.096                      | 7674.7                     | 1.598                        | High               |
| 12       | BE       | Belgium                  | 2.627                      | 9766.2                     | 1.405                        | High               |
| 13       | FI       | Finland                  | 2.79                       | 4553.6                     | 1.332                        | High               |
| 14       | NL       | Netherlands              | 2.119                      | 16743.5                    | 1.254                        | High               |
| 15       | AU       | Australia                | 1.9                        | 23909.6                    | 1.214                        | High               |
| 16       | CA       | Canada                   | 1.712                      | 31716.3                    | 1.175                        | High               |
| 17       | IT       | Italy                    | 1.369                      | 33143.2                    | 1.006                        | High               |
| 18       | BR       | Brazil                   | 1.187                      | 28555.4                    | 0.882                        | High               |
| 19       | CZ       | Czechia                  | 1.795                      | 6178.9                     | 0.881                        | High               |
| 20       | ES       | Spain                    | 1.207                      | 26607.1                    | 0.877                        | High               |
| 21       | IN       | India                    | 0.672                      | 52155.5                    | 0.74                         | High               |
| 22       | RU       | Russia                   | 1.076                      | 18860.3                    | 0.739                        | High               |
| 23       | SI       | Slovenia                 | 2.023                      | 1550.3                     | 0.713                        | High               |
| 24       | TR       | Turkey                   | 1.134                      | 12891.6                    | 0.69                         | High               |
| 25       | PL       | Poland                   | 1.046                      | 13850.5                    | 0.66                         | High               |
| 26       | PT       | Portugal                 | 1.3                        | 6466.2                     | 0.634                        | High               |
| 27       | MY       | Malaysia                 | 1.245                      | 5493.8                     | 0.572                        | High               |
| 28       | HU       | Hungary                  | 1.333                      | 3922.5                     | 0.548                        | High               |
| 29       | NZ       | New Zealand              | 1.287                      | 3674.0                     | 0.511                        | High               |
| 30       | IR       | Iran                     | 0.577                      | 19166.5                    | 0.484                        | High               |
| 31       | IE       | Ireland                  | 1.145                      | 4250.2                     | 0.468                        | High               |
| 32       | IS       | Iceland                  | 2.094                      | 335.1                      | 0.435                        | High               |
| 33       | GR       | Greece                   | 1.083                      | 4122.6                     | 0.429                        | High               |
| 34       | EG       | Egypt                    | 0.69                       | 8170.1                     | 0.367                        | High               |
| 35       | TH       | Thailand                 | 0.877                      | 4825.9                     | 0.355                        | High               |
| 36       | ZA       | South Africa             | 0.732                      | 4158.3                     | 0.25                         | High               |
| 37       | EE       | Estonia                  | 1.324                      | 702.0                      | 0.189                        | High               |
| 38       | MX       | Mexico                   | 0.352                      | 7971.7                     | 0.187                        | Middle             |
| 39       | AR       | Argentina                | 0.556                      | 4768.6                     | 0.187                        | Middle             |
| 40       | SK       | Slovakia                 | 0.913                      | 1638.7                     | 0.151                        | Middle             |
| 41       | RS       | Serbia                   | 0.827                      | 1878.7                     | 0.135                        | Middle             |
| 42       | HR       | Croatia                  | 0.865                      | 1630.6                     | 0.125                        | Middle             |
| 43       | ID       | Indonesia                | 0.237                      | 7423.1                     | 0.113                        | Middle             |
| 44       | UA       | Ukraine                  | 0.505                      | 3398.5                     | 0.09                         | Middle             |
| 45       | LU       | Luxembourg               | 1.232                      | 515.5                      | 0.078                        | Middle             |
| 46       | BG       | Bulgaria                 | 0.804                      | 1410.7                     | 0.064                        | Middle             |
| 47       | TN       | Tunisia                  | 0.644                      | 1811.6                     | 0.033                        | Middle             |
| 48       | AE       | United Arab Emirates     | 1.02                       | 694.5                      | 0.03                         | Middle             |
| 49       | RO       | Romania                  | 0.495                      | 2564.9                     | 0.028                        | Middle             |
| 50       | LT       | Lithuania                | 0.927                      | 750.9                      | -0.002                       | Middle             |
| 51       | CL       | Chile                    | 0.37                       | 2998.0                     | -0.005                       | Middle             |
| 52       | PK       | Pakistan                 | 0.217                      | 4128.8                     | -0.018                       | Middle             |
| 53       | CO       | Colombia                 | 0.302                      | 3083.1                     | -0.034                       | Middle             |
| 54       | VN       | Vietnam                  | 0.388                      | 1596.0                     | -0.126                       | Middle             |
| 55       | JO       | Jordan                   | 0.695                      | 631.7                      | -0.157                       | Middle             |
| 56       | DZ       | Algeria                  | 0.479                      | 929.1                      | -0.19                        | Middle             |
| 57       | CU       | Cuba                     | 0.435                      | 988.3                      | -0.2                         | Middle             |
| 58       | QA       | Qatar                    | 0.525                      | 643.5                      | -0.242                       | Middle             |
| 59       | BY       | Belarus                  | 0.547                      | 568.9                      | -0.255                       | Middle             |
| 60       | ET       | Ethiopia                 | 0.274                      | 961.1                      | -0.289                       | Middle             |
| 61       | IQ       | Iraq                     | 0.042                      | 1655.5                     | -0.297                       | Middle             |
| 62       | UY       | Uruguay                  | 0.418                      | 599.0                      | -0.312                       | Middle             |
| 63       | PR       | Puerto Rico              | 0.429                      | 572.4                      | -0.315                       | Middle             |
| 64       | LV       | Latvia                   | 0.571                      | 399.2                      | -0.316                       | Middle             |

|     |    |                     |       |       |        |        |
|-----|----|---------------------|-------|-------|--------|--------|
| 65  | CY | Cyprus              | 0.537 | 417.4 | -0.324 | Middle |
| 66  | PH | Philippines         | 0.24  | 822.4 | -0.339 | Middle |
| 67  | CR | Costa Rica          | 0.419 | 488.6 | -0.353 | Middle |
| 68  | PE | Peru                | 0.121 | 947.2 | -0.371 | Middle |
| 69  | PA | Panama              | 0.124 | 685.6 | -0.436 | Middle |
| 70  | LK | Sri Lanka           | 0.115 | 653.9 | -0.45  | Middle |
| 71  | KZ | Kazakhstan          | 0.139 | 466.9 | -0.507 | Middle |
| 72  | BF | Burkina Faso        | 0.614 | 122.8 | -0.536 | Middle |
| 73  | MK | North Macedonia     | 0.4   | 210.4 | -0.536 | Middle |
| 74  | SN | Senegal             | 0.577 | 134.0 | -0.537 | Middle |
| 75  | OM | Oman                | 0.209 | 322.7 | -0.547 | Low    |
| 76  | BA | Bosnia and Herz.    | 0.205 | 304.6 | -0.561 | Low    |
| 77  | AM | Armenia             | 0.225 | 279.7 | -0.568 | Low    |
| 78  | GE | Georgia             | 0.279 | 208.2 | -0.601 | Low    |
| 79  | KW | Kuwait              | 0.08  | 279.0 | -0.643 | Low    |
| 80  | CI | Côte d'Ivoire       | 0.07  | 274.1 | -0.652 | Low    |
| 81  | AZ | Azerbaijan          | 0.199 | 190.8 | -0.66  | Low    |
| 82  | MN | Mongolia            | 0.144 | 215.4 | -0.663 | Low    |
| 83  | RW | Rwanda              | 0.649 | 57.2  | -0.673 | Low    |
| 84  | CD | Dem. Rep. Congo     | 0.406 | 92.7  | -0.7   | Low    |
| 85  | ML | Mali                | 0.255 | 117.8 | -0.73  | Low    |
| 86  | TJ | Tajikistan          | 0.103 | 170.2 | -0.733 | Low    |
| 87  | UZ | Uzbekistan          | 0.145 | 151.7 | -0.735 | Low    |
| 88  | PY | Paraguay            | 0.127 | 156.9 | -0.737 | Low    |
| 89  | MD | Moldova             | 0.275 | 99.8  | -0.753 | Low    |
| 90  | BO | Bolivia             | 0.076 | 141.6 | -0.784 | Low    |
| 91  | ME | Montenegro          | 0.388 | 56.7  | -0.81  | Low    |
| 92  | MZ | Mozambique          | 0.308 | 65.8  | -0.821 | Low    |
| 93  | MM | Myanmar             | 0.045 | 126.3 | -0.824 | Low    |
| 94  | SY | Syria               | 0.019 | 119.7 | -0.848 | Low    |
| 95  | BN | Brunei              | 0.278 | 57.2  | -0.865 | Low    |
| 96  | BI | Burundi             | 0.213 | 60.1  | -0.888 | Low    |
| 97  | KH | Cambodia            | 0.088 | 81.2  | -0.892 | Low    |
| 98  | GT | Guatemala           | 0.028 | 81.7  | -0.922 | Low    |
| 99  | MG | Madagascar          | 0.013 | 81.8  | -0.929 | Low    |
| 100 | TT | Trinidad and Tobago | 0.084 | 67.3  | -0.932 | Low    |
| 101 | KG | Kyrgyzstan          | 0.11  | 51.0  | -0.975 | Low    |
| 102 | NI | Nicaragua           | 0.107 | 47.3  | -0.992 | Low    |
| 103 | HN | Honduras            | 0.04  | 54.5  | -0.998 | Low    |
| 104 | GM | Gambia              | 0.069 | 33.4  | -1.081 | Low    |
| 105 | SV | El Salvador         | 0.159 | 25.3  | -1.09  | Low    |
| 106 | PG | Papua New Guinea    | 0.032 | 29.8  | -1.123 | Low    |
| 107 | AO | Angola              | 0.032 | 29.1  | -1.127 | Low    |
| 108 | SZ | eSwatini            | 0.278 | 7.0   | -1.273 | Low    |
| 109 | TD | Chad                | 0.233 | 7.0   | -1.297 | Low    |
| 110 | LS | Lesotho             | 0.051 | 4.3   | -1.475 | Low    |
| 111 | MR | Mauritania          | 0.01  | 4.2   | -1.501 | Low    |
| 112 | TM | Turkmenistan        | 0.11  | 2.0   | -1.564 | Low    |

Note: R&D strength is a composite index combining each country's average R&D expenditure as a share of GDP (2015–2018) and its pre-2019 life-science publication output. Countries are ranked by this index and grouped into high- (30%), middle-(40%), and low-R&D-strength (30%) tiers used throughout the analysis. Pre-AlphaFold life-science output is measured using fractional publication counts and is rounded to one decimal place for presentation.

**Table 3 | Collaboration and authorship indicators and their operational definitions.**

| <b>Indicator</b>                          | <b>Operational definition</b>                                                                                                                                                                                                                                                                                    | <b>Unit/Scale</b>                             |
|-------------------------------------------|------------------------------------------------------------------------------------------------------------------------------------------------------------------------------------------------------------------------------------------------------------------------------------------------------------------|-----------------------------------------------|
| <b>International co-authorship rate</b>   | A paper is classified as internationally co-authored when author affiliations span at least two countries or regions. The indicator reports, by publication quarter, the share of AlphaFold-related and non-AlphaFold life-science papers that are internationally co-authored.                                  | % of papers                                   |
| <b>Mean team size</b>                     | Team size is the number of authors listed on a publication. The indicator tracks the mean team size for AlphaFold-related and non-AlphaFold papers by publication year.                                                                                                                                          | authors per paper                             |
| <b>Large team share</b>                   | Publications are grouped into author-count bins. The indicator reports, by year, the share of AlphaFold-related and non-AlphaFold papers falling into large-team categories (for example, 10–19 and $\geq 20$ authors).                                                                                          | % of papers in a team-size bin                |
| <b>Group-level collaboration matrix</b>   | Countries are assigned to low, middle, and high R&D-strength groups. AlphaFold-related country–country co-authorships are aggregated into a weighted matrix by source and partner group, and each cell records the row-normalized share of collaboration weight from a source group to a partner group.          | % of collaboration weight within source group |
| <b>Collaboration centrality</b>           | Country position in the AlphaFold international co-authorship network is measured using eigenvector centrality. The plotted values are $\log_{10}$ -transformed eigenvector centrality scores.                                                                                                                   | $\log_{10}$ (eigenvector centrality)          |
| <b>First-author share</b>                 | The share of total AlphaFold-related first-author country credit captured by each R&D-strength group, where first-author country credit is aggregated from affiliation-based first-author country assignments.                                                                                                   | % of total AF first-author credit             |
| <b>Last-author share</b>                  | The share of total AlphaFold-related last-author country credit captured by each R&D-strength group, where last-author country credit is aggregated from affiliation-based last-author country assignments.                                                                                                      | % of total AF last-author credit              |
| <b>First-author ratio (country level)</b> | For each country, the first-author ratio is defined as (fractional first-author AlphaFold output) / (fractional total AlphaFold output). First-author output is fractionalized across first-author countries only, whereas total output is fractionalized across all participating countries.                    | % ratio                                       |
| <b>Last-author ratio (country level)</b>  | For each country, the last-author ratio is defined as $100 \times$ (fractional last-author AlphaFold output) / (fractional total AlphaFold output). Last-author output is fractionalized across last-author countries only, whereas total AlphaFold output is fractionalized across all participating countries. | % ratio                                       |

**Table 4 | Country rankings by AlphaFold-related and non-AlphaFold life-science output.**

| Rank | ISO Code | Country                  | AF output | Non-AF output |
|------|----------|--------------------------|-----------|---------------|
| 1    | US       | United States of America | 7929.2    | 586756.3      |
| 2    | CN       | China                    | 4429.5    | 594931.0      |
| 3    | DE       | Germany                  | 1857.3    | 109068.1      |
| 4    | GB       | United Kingdom           | 1832.0    | 109590.6      |
| 5    | JP       | Japan                    | 1017.4    | 99730.8       |
| 6    | FR       | FR                       | 975.7     | 73471.4       |
| 7    | IN       | India                    | 853.6     | 142386.5      |
| 8    | CA       | Canada                   | 813.5     | 57445.8       |
| 9    | IT       | Italy                    | 559.5     | 69196.2       |
| 10   | ES       | Spain                    | 551.1     | 52979.7       |
| 11   | KR       | South Korea              | 542.0     | 57706.5       |
| 12   | CH       | Switzerland              | 510.5     | 27100.0       |
| 13   | AU       | Australia                | 476.0     | 43313.4       |
| 14   | NL       | Netherlands              | 408.1     | 31238.6       |
| 15   | SE       | Sweden                   | 354.0     | 20038.7       |
| 16   | RU       | Russia                   | 332.2     | 49222.6       |
| 17   | DK       | Denmark                  | 323.8     | 16640.6       |
| 18   | PL       | Poland                   | 281.5     | 27063.8       |
| 19   | IL       | Israel                   | 262.4     | 14281.0       |
| 20   | AT       | Austria                  | 221.6     | 13463.0       |
| 21   | BR       | Brazil                   | 220.7     | 54192.6       |
| 22   | BE       | Belgium                  | 216.5     | 18150.8       |
| 23   | CZ       | Czechia                  | 216.4     | 12517.7       |
| 24   | TW       | Taiwan                   | 148.2     | 21411.0       |
| 25   | MX       | Mexico                   | 145.0     | 18221.5       |
| 26   | SG       | SG                       | 139.6     | 9689.3        |
| 27   | TR       | Turkey                   | 130.4     | 34799.2       |
| 28   | AR       | Argentina                | 106.7     | 8642.0        |
| 29   | SA       | Saudi Arabia             | 105.5     | 15749.7       |
| 30   | HK       | Hong Kong S.A.R.         | 96.7      | 6864.8        |

|    |    |                      |      |         |
|----|----|----------------------|------|---------|
| 31 | HU | Hungary              | 91.7 | 8063.8  |
| 32 | NO | NO                   | 91.4 | 8921.0  |
| 33 | IR | Iran                 | 87.9 | 40503.2 |
| 34 | FI | Finland              | 87.5 | 8469.9  |
| 35 | PK | Pakistan             | 79.4 | 15592.4 |
| 36 | PT | Portugal             | 75.2 | 13812.8 |
| 37 | NZ | New Zealand          | 74.4 | 6891.0  |
| 38 | TH | Thailand             | 69.5 | 12272.5 |
| 39 | GR | Greece               | 63.1 | 9379.0  |
| 40 | ZA | South Africa         | 56.5 | 9155.1  |
| 41 | CL | Chile                | 56.2 | 6125.8  |
| 42 | EG | Egypt                | 54.6 | 24153.1 |
| 43 | IE | Ireland              | 51.9 | 8222.2  |
| 44 | BD | Bangladesh           | 51.5 | 6860.3  |
| 45 | MY | Malaysia             | 46.7 | 11960.1 |
| 46 | SI | Slovenia             | 41.0 | 3202.9  |
| 47 | MO | MO                   | 40.7 | 1947.8  |
| 48 | LT | Lithuania            | 40.0 | 1764.5  |
| 49 | ID | Indonesia            | 38.3 | 27307.1 |
| 50 | AE | United Arab Emirates | 36.5 | 3339.1  |
| 51 | SK | Slovakia             | 25.0 | 3170.8  |
| 52 | UA | Ukraine              | 24.3 | 7731.8  |
| 53 | VN | Vietnam              | 24.1 | 6425.3  |
| 54 | EE | Estonia              | 22.0 | 1438.9  |
| 55 | PH | Philippines          | 21.8 | 2886.0  |
| 56 | RO | Romania              | 21.1 | 6448.4  |
| 57 | CO | Colombia             | 18.8 | 6861.0  |
| 58 | BG | Bulgaria             | 18.5 | 3386.5  |
| 59 | HR | Croatia              | 16.6 | 3433.1  |
| 60 | ET | Ethiopia             | 14.0 | 3765.0  |
| 61 | NG | Nigeria              | 13.7 | 11701.6 |
| 62 | BY | Belarus              | 13.6 | 1674.9  |
| 63 | PE | Peru                 | 13.4 | 2662.1  |
| 64 | SS | S. Sudan             | 11.7 | 507.9   |

|    |    |             |      |         |
|----|----|-------------|------|---------|
| 65 | UY | Uruguay     | 11.6 | 1342.7  |
| 66 | PR | Puerto Rico | 11.6 | 1367.7  |
| 67 | QA | Qatar       | 11.0 | 1940.8  |
| 68 | RS | Serbia      | 10.9 | 3641.2  |
| 69 | EC | Ecuador     | 10.7 | 2275.2  |
| 70 | LK | Sri Lanka   | 9.6  | 1849.8  |
| 71 | AM | Armenia     | 9.2  | 753.7   |
| 72 | KZ | Kazakhstan  | 9.0  | 2093.6  |
| 73 | CY | Cyprus      | 8.8  | 1310.5  |
| 74 | MA | Morocco     | 8.7  | 3554.5  |
| 75 | KP | North Korea | 8.5  | 87.3    |
| 76 | NP | Nepal       | 8.3  | 2515.8  |
| 77 | IS | Iceland     | 8.0  | 660.7   |
| 78 | IQ | Iraq        | 7.7  | 10041.7 |
| 79 | TJ | Tajikistan  | 7.0  | 609.0   |
| 80 | LU | Luxembourg  | 6.9  | 1010.3  |
| 81 | TN | Tunisia     | 6.5  | 3241.9  |
| 82 | KW | Kuwait      | 6.5  | 776.5   |
| 83 | LB | Lebanon     | 6.4  | 1673.7  |
| 84 | JO | Jordan      | 6.2  | 2302.6  |
| 85 | YE | Yemen       | 6.1  | 586.7   |
| 86 | LA | Laos        | 5.8  | 201.2   |
| 87 | LV | Latvia      | 5.7  | 1397.7  |
| 88 | CU | Cuba        | 5.6  | 1101.4  |
| 89 | BI | Burundi     | 5.6  | 177.3   |
| 90 | CR | Costa Rica  | 4.6  | 1127.5  |
| 91 | KN | KN          | 4.1  | 263.9   |
| 92 | OM | Oman        | 3.7  | 795.8   |
| 93 | UZ | Uzbekistan  | 3.5  | 1499.9  |
| 94 | KE | Kenya       | 3.4  | 1890.6  |
| 95 | SD | Sudan       | 3.4  | 984.6   |
| 96 | AZ | Azerbaijan  | 3.2  | 731.2   |
| 97 | RW | Rwanda      | 3.1  | 288.2   |
| 98 | DZ | Algeria     | 3.0  | 1928.1  |

|     |    |                  |     |        |
|-----|----|------------------|-----|--------|
| 99  | GH | Ghana            | 2.8 | 1592.2 |
| 100 | RE | RE               | 2.7 | 196.4  |
| 101 | MK | North Macedonia  | 2.5 | 537.0  |
| 102 | ME | Montenegro       | 2.5 | 244.3  |
| 103 | BW | Botswana         | 2.3 | 296.7  |
| 104 | PS | Palestine        | 2.3 | 579.2  |
| 105 | MT | MT               | 2.1 | 267.4  |
| 106 | VE | Venezuela        | 2.0 | 561.1  |
| 107 | UG | Uganda           | 1.9 | 1208.2 |
| 108 | MN | Mongolia         | 1.8 | 571.4  |
| 109 | BA | Bosnia and Herz. | 1.8 | 676.3  |
| 110 | MD | Moldova          | 1.8 | 369.5  |
| 111 | NI | Nicaragua        | 1.7 | 153.7  |
| 112 | DO | Dominican Rep.   | 1.7 | 201.6  |
| 113 | GE | Georgia          | 1.6 | 808.1  |
| 114 | MG | Madagascar       | 1.6 | 270.5  |
| 115 | ZM | Zambia           | 1.4 | 1041.2 |
| 116 | CM | Cameroon         | 1.4 | 1297.3 |
| 117 | BS | Bahamas          | 1.4 | 21.2   |
| 118 | PA | Panama           | 1.3 | 2160.0 |
| 119 | FJ | Fiji             | 1.3 | 115.2  |
| 120 | PY | Paraguay         | 1.2 | 409.0  |
| 121 | BO | Bolivia          | 1.2 | 385.1  |
| 122 | MU | MU               | 1.0 | 134.2  |
| 123 | MV | MV               | 1.0 | 89.6   |
| 124 | MW | Malawi           | 0.9 | 242.2  |
| 125 | KY | KY               | 0.8 | 16.3   |
| 126 | PG | Papua New Guinea | 0.7 | 79.3   |
| 127 | GT | Guatemala        | 0.6 | 241.7  |
| 128 | SN | Senegal          | 0.6 | 397.6  |
| 129 | HT | Haiti            | 0.5 | 38.6   |
| 130 | KH | Cambodia         | 0.5 | 530.0  |
| 131 | SV | El Salvador      | 0.5 | 74.4   |
| 132 | VI | VI               | 0.5 | 16.0   |

|     |    |               |     |       |
|-----|----|---------------|-----|-------|
| 133 | TZ | Tanzania      | 0.5 | 962.0 |
| 134 | ML | Mali          | 0.5 | 255.8 |
| 135 | JM | Jamaica       | 0.4 | 121.0 |
| 136 | BF | Burkina Faso  | 0.3 | 418.9 |
| 137 | HN | Honduras      | 0.3 | 123.3 |
| 138 | MZ | Mozambique    | 0.3 | 166.8 |
| 139 | NE | Niger         | 0.3 | 144.9 |
| 140 | SY | Syria         | 0.3 | 552.3 |
| 141 | BJ | Benin         | 0.3 | 375.4 |
| 142 | LI | LI            | 0.3 | 31.8  |
| 143 | AL | Albania       | 0.3 | 267.1 |
| 144 | GM | Gambia        | 0.3 | 91.0  |
| 145 | GU | GU            | 0.3 | 30.4  |
| 146 | TG | Togo          | 0.3 | 132.3 |
| 147 | WS | WS            | 0.2 | 15.0  |
| 148 | ZW | Zimbabwe      | 0.2 | 351.7 |
| 149 | BM | BM            | 0.1 | 9.0   |
| 150 | GD | GD            | 0.1 | 115.5 |
| 151 | CI | Côte d'Ivoire | 0.1 | 635.0 |
| 152 | AG | AG            | 0.0 | 314.8 |

Note: AF output and non-AF output denote fractional counts of AlphaFold-related and other life-science publications, respectively, aggregated by country and rounded to one decimal place for presentation.

**Table 5 | Definitions and indicator composition of the AI4S capacity dimensions.**

| <b>Dimension</b>                                          | <b>Conceptual focus</b>                                                                                                                                                                      | <b>Underlying indicators</b>                                                                                                                    |
|-----------------------------------------------------------|----------------------------------------------------------------------------------------------------------------------------------------------------------------------------------------------|-------------------------------------------------------------------------------------------------------------------------------------------------|
| <b>Adoption speed</b>                                     | Captures both the timing of initial AlphaFold uptake and the subsequent pace of diffusion within national life-science research systems.                                                     | (i) The year of each country’s first AlphaFold-related publication over 2019–2025.                                                              |
|                                                           |                                                                                                                                                                                              | (ii) The relative timing score comparing each country’s first-use year to the earliest adopter; and                                             |
|                                                           |                                                                                                                                                                                              | (iii) The country-specific growth rate in cumulative AlphaFold-related publications estimated over 2019–2025.                                   |
| <b>Production output</b>                                  | Captures the scale and citation impact of a country’s AlphaFold-related life-science research output.                                                                                        | (i) Fractional counts of AlphaFold-related publications over 2019–2025, assigning each country a share when a paper lists country affiliations. |
|                                                           |                                                                                                                                                                                              | (ii) Field- and year-normalized citation scores for AlphaFold-related papers, averaged for each country using fractional-count weights.         |
| <b>Network influence</b>                                  | Captures how strongly a country shapes and occupies central positions in AlphaFold-related international collaboration networks, including its tendency to take on leading authorship roles. | (i) Eigenvector centrality in the weighted country–country AlphaFold co-authorship network, based on fractional co-authorship counts.           |
|                                                           |                                                                                                                                                                                              | (ii) The ratio of fractional first-author positions to total fractional participation in AlphaFold-related publications; and                    |
|                                                           |                                                                                                                                                                                              | (iii) The ratio of fractional last-author positions to total fractional participation.                                                          |
| <b>Composite AI4S capacity index</b>                      | Overall AI4S capacity of national research systems, combining adoption, production, and network dimensions.                                                                                  | The three standardized AI4S capacity dimensions: adoption speed, production output (scale and impact), and network influence.                   |
| <b>PCA-based AI4S capacity index (robustness measure)</b> | Data-driven summary of the shared variation across the AI4S capacity dimensions.                                                                                                             | The same three standardized dimensions as above: adoption speed, production output (scale and impact), and network influence.                   |

Note: The AI4S capacity measure is constructed for the common sample of 77 countries that have non-missing values on all three dimensions—adoption speed, production scale and impact, and network influence. Network influence combines a country’s eigenvector centrality in the AlphaFold co-authorship network with first- and last-author leadership ratios; all components are transformed and standardized to z-scores before aggregation. The composite AI4S capacity index takes the equal-weight average of the three-dimension scores, while a PCA-based index using the same inputs is reported as a robustness check in Extended Data Figure 19.

**Table 6 | Composite AI4S capacity scores and country rankings.**

| Rank | Country                  | Composite AI4S capacity score | Adoption speed | Production output | Network influence | R&D-strength group |
|------|--------------------------|-------------------------------|----------------|-------------------|-------------------|--------------------|
| 1    | United States of America | 3.217                         | 4.622          | 2.576             | 1.069             | High               |
| 2    | United Kingdom           | 2.324                         | 2.958          | 2.098             | 0.917             | High               |
| 3    | China                    | 2.039                         | 1.929          | 2.208             | 1.104             | High               |
| 4    | South Korea              | 1.847                         | 2.499          | 1.577             | 0.67              | High               |
| 5    | Canada                   | 1.522                         | 1.763          | 1.374             | 0.774             | High               |
| 6    | Germany                  | 1.329                         | 0.596          | 1.85              | 0.968             | High               |
| 7    | Japan                    | 1.319                         | 1.183          | 1.521             | 0.686             | High               |
| 8    | Brazil                   | 1.215                         | 1.763          | 0.689             | 0.672             | High               |
| 9    | Italy                    | 1.037                         | 0.596          | 1.23              | 0.839             | High               |
| 10   | Denmark                  | 1.012                         | 0.933          | 1.017             | 0.652             | High               |
| 11   | Switzerland              | 1.0                           | 0.596          | 1.253             | 0.722             | High               |
| 12   | Australia                | 0.948                         | 0.596          | 1.094             | 0.746             | High               |
| 13   | Israel                   | 0.896                         | 0.493          | 0.972             | 0.839             | High               |
| 14   | Spain                    | 0.867                         | 0.204          | 1.184             | 0.839             | High               |
| 15   | Sweden                   | 0.863                         | 0.393          | 1.072             | 0.754             | High               |
| 16   | Russia                   | 0.859                         | 0.596          | 0.916             | 0.695             | High               |
| 17   | Mexico                   | 0.8                           | 1.183          | 0.36              | 0.513             | Middle             |
| 18   | Austria                  | 0.793                         | 0.596          | 0.811             | 0.632             | High               |
| 19   | India                    | 0.78                          | 0.026          | 1.227             | 0.75              | High               |
| 20   | Netherlands              | 0.756                         | 0.026          | 1.147             | 0.769             | High               |
| 21   | Belgium                  | 0.708                         | 0.204          | 0.76              | 0.855             | High               |
| 22   | Finland                  | 0.626                         | 0.393          | 0.53              | 0.685             | High               |
| 23   | Chile                    | 0.571                         | 1.183          | -0.032            | 0.316             | Middle             |
| 24   | Poland                   | 0.57                          | 0.026          | 0.862             | 0.577             | High               |
| 25   | Portugal                 | 0.412                         | 0.026          | 0.197             | 0.835             | High               |
| 26   | Greece                   | 0.36                          | 0.114          | 0.138             | 0.673             | High               |

|    |                      |        |        |        |        |        |
|----|----------------------|--------|--------|--------|--------|--------|
| 27 | Czechia              | 0.325  | -0.22  | 0.691  | 0.365  | High   |
| 28 | Turkey               | 0.318  | -0.058 | 0.35   | 0.525  | High   |
| 29 | Hungary              | 0.314  | -0.058 | 0.347  | 0.519  | High   |
| 30 | Argentina            | 0.287  | -0.058 | 0.386  | 0.411  | Middle |
| 31 | Pakistan             | 0.211  | -0.14  | 0.175  | 0.507  | Middle |
| 32 | Lithuania            | 0.154  | 0.114  | 0.094  | 0.189  | Middle |
| 33 | Iran                 | 0.127  | -0.372 | 0.143  | 0.555  | High   |
| 34 | Ireland              | 0.096  | 0.026  | 0.089  | 0.132  | High   |
| 35 | New Zealand          | 0.083  | -0.14  | 0.254  | 0.099  | High   |
| 36 | South Africa         | 0.06   | 0.204  | 0.019  | -0.069 | High   |
| 37 | Thailand             | 0.026  | -0.586 | 0.046  | 0.607  | High   |
| 38 | Malaysia             | -0.065 | -0.058 | 0.008  | -0.118 | High   |
| 39 | Estonia              | -0.071 | -0.14  | -0.329 | 0.286  | High   |
| 40 | Ukraine              | -0.077 | 0.393  | -0.271 | -0.32  | Middle |
| 41 | Indonesia            | -0.133 | -0.445 | -0.187 | 0.29   | Middle |
| 42 | Egypt                | -0.17  | -0.14  | -0.002 | -0.294 | High   |
| 43 | Iceland              | -0.19  | -0.445 | -0.78  | 0.736  | High   |
| 44 | United Arab Emirates | -0.234 | -0.297 | -0.022 | -0.283 | Middle |
| 45 | Serbia               | -0.245 | -0.22  | -0.789 | 0.38   | Middle |
| 46 | Slovenia             | -0.27  | -0.445 | -0.131 | -0.117 | High   |
| 47 | Croatia              | -0.288 | -0.297 | -0.566 | 0.124  | Middle |
| 48 | Colombia             | -0.325 | -0.372 | -0.623 | 0.16   | Middle |
| 49 | Slovakia             | -0.388 | -0.445 | -0.333 | -0.219 | Middle |
| 50 | Romania              | -0.434 | -0.22  | -0.414 | -0.482 | Middle |
| 51 | Luxembourg           | -0.486 | -0.517 | -0.997 | 0.264  | Middle |
| 52 | Qatar                | -0.491 | -1.087 | -0.779 | 0.605  | Middle |
| 53 | Armenia              | -0.5   | -0.445 | -0.367 | -0.473 | Low    |
| 54 | Vietnam              | -0.583 | -0.97  | -0.52  | -0.009 | Middle |
| 55 | Tunisia              | -0.652 | -0.445 | -1.101 | -0.129 | Middle |
| 56 | Philippines          | -0.673 | -0.848 | -0.47  | -0.411 | Middle |
| 57 | Peru                 | -0.725 | -0.372 | -0.629 | -0.863 | Middle |

|    |                  |        |        |        |        |        |
|----|------------------|--------|--------|--------|--------|--------|
| 58 | Latvia           | -0.731 | -0.14  | -1.119 | -0.62  | Middle |
| 59 | Bulgaria         | -0.762 | -0.445 | -0.702 | -0.811 | Middle |
| 60 | Uruguay          | -0.796 | -0.445 | -0.915 | -0.685 | Middle |
| 61 | Cyprus           | -0.816 | -0.22  | -0.711 | -1.167 | Middle |
| 62 | Belarus          | -0.839 | -0.517 | -0.782 | -0.859 | Middle |
| 63 | Kazakhstan       | -0.853 | -1.199 | -0.849 | -0.143 | Middle |
| 64 | Ethiopia         | -0.896 | -0.785 | -0.725 | -0.793 | Middle |
| 65 | Jordan           | -0.964 | -0.909 | -1.271 | -0.296 | Middle |
| 66 | Kuwait           | -0.981 | -0.97  | -0.851 | -0.702 | Low    |
| 67 | Puerto Rico      | -0.982 | -1.029 | -0.288 | -1.208 | Middle |
| 68 | Sri Lanka        | -1.018 | -0.22  | -0.974 | -1.423 | Middle |
| 69 | Burundi          | -1.1   | -1.306 | -1.044 | -0.478 | Low    |
| 70 | Panama           | -1.224 | -0.445 | -1.734 | -0.968 | Middle |
| 71 | Tajikistan       | -1.301 | -0.445 | -1.241 | -1.658 | Low    |
| 72 | Cuba             | -1.464 | -0.909 | -1.2   | -1.653 | Middle |
| 73 | Bosnia and Herz. | -1.542 | -1.029 | -1.754 | -1.181 | Low    |
| 74 | Montenegro       | -1.581 | -0.909 | -1.477 | -1.676 | Low    |
| 75 | Rwanda           | -1.809 | -1.359 | -1.446 | -1.846 | Low    |
| 76 | Oman             | -1.962 | -1.653 | -1.413 | -1.977 | Low    |
| 77 | North Macedonia  | -2.048 | -1.46  | -1.428 | -2.375 | Middle |

Note: the table reports composite AI4S capacity scores and country rankings for the common 77-country sample. The composite score is the equal-weight average of the three standardized dimension scores – adoption speed, production output, and network influence – such that higher values indicate stronger AI4S capacity. Countries are ranked in descending order of the composite score.

**Table 7 | Threshold (piecewise) regression results for AI4S outcomes.**

|                                                | <b>Adoption speed</b> | <b>Production output</b> |
|------------------------------------------------|-----------------------|--------------------------|
| <b>Threshold <math>\hat{\tau}</math></b>       | 0.716                 | 0.510                    |
| <b>Pre-threshold slope</b>                     | 0.765                 | 0.734                    |
| <b>Slope change at <math>\hat{\tau}</math></b> | 6.453                 | 2.905                    |
| <b>Post-threshold slope</b>                    | 7.128                 | 3.639                    |
| <b>p-value for slope change</b>                | <0.001                | <0.001                   |
| <b>Weighted SSE</b>                            | 893.375               | 130.796                  |
| <b>n below <math>\hat{\tau}</math></b>         | 61                    | 46                       |
| <b>n above <math>\hat{\tau}</math></b>         | 16                    | 31                       |
| <b>Total n</b>                                 | 77                    | 77                       |

Note: the table reports threshold (piecewise) regression estimates for the relationship between network influence and two AI4S outcomes: adoption speed, and production output (scale and impact).  $\hat{\tau}$  denotes the estimated breakpoint in network influence. The pre-threshold slope gives the estimated slope below  $\hat{\tau}$ , the slope change gives the increase in slope above  $\hat{\tau}$ , and the post-threshold slope gives the resulting slope above the threshold. p-values test whether the change in slope differs from zero. All results are based on the common 77-country sample.
